# Supplementary material for: Pre-diagnosis fiber : carbohydrate intake ratio and mortality of ovarian cancer: results from a prospective cohort study
Source: Royal Society of Chemistry journal article supplement (doi:10.1039/d2fo01379g), 2022-01-01
Supplement: d2fo01379g1.pdf [file d2fo01379g1.pdf]

**Supplementary Table 1.** Baseline characteristics of ovarian cancer patients by tertile of fiber and carbohydrates

| Variables *                                    | Fiber*        |               |               | P value | Carbohydrate* |               |               | P value |
|------------------------------------------------|---------------|---------------|---------------|---------|---------------|---------------|---------------|---------|
|                                                | Tertile 1     | Tertile 2     | Tertile 3     |         | Tertile 1     | Tertile 2     | Tertile 3     |         |
| Range, g                                       | < 15.31       | 15.31-18.77   | ≥ 18.77       |         | < 218.74      | 218.74-238.39 | ≥ 238.39      |         |
| No. of patients/deaths                         | 234/49        | 234/47        | 235/34        |         | 234/47        | 234/40        | 235/43        |         |
| Mean (SD) age at diagnosis (years)             | 52.98 (10.05) | 53.68 (8.96)  | 54.23 (9.30)  | 0.36    | 53.40 (8.87)  | 53.46 (9.56)  | 54.03 (9.91)  | 0.73    |
| Mean (SD) follow-up time (months)              | 30.81 (16.07) | 32.07 (16.70) | 35.39 (16.52) | < 0.05  | 33.83 (16.47) | 32.04 (16.29) | 32.41 (16.82) | 0.47    |
| Mean (SD) body mass index (kg/m <sup>2</sup> ) | 23.49 (3.46)  | 23.01 (3.86)  | 23.24 (3.42)  | 0.36    | 23.29 (3.68)  | 23.31 (3.36)  | 23.14 (3.71)  | 0.85    |
| Mean (SD) physical activity (MET h/d)          | 16.53 (12.16) | 15.66 (10.78) | 15.07 (10.74) | 0.37    | 15.41 (10.54) | 15.94 (11.88) | 15.90 (11.32) | 0.85    |
| Ever diet change                               | 53 (22.65)    | 56 (23.93)    | 59 (25.11)    | 0.82    | 59 (25.21)    | 56 (23.93)    | 53 (22.55)    | 0.80    |
| Ever cigarette smoking                         | 27 (11.54)    | 22 (9.40)     | 19 (8.09)     | 0.44    | 25 (10.68)    | 25 (10.68)    | 18 (7.66)     | 0.44    |
| Ever alcohol drinking                          | 63 (26.92)    | 45 (19.23)    | 41 (17.45)    | < 0.05  | 61 (26.07)    | 51 (21.79)    | 37 (15.74)    | < 0.05  |
| Ever menopause                                 | 162 (69.23)   | 164 (70.09)   | 182 (77.45)   | 0.10    | 160 (68.38)   | 171 (73.08)   | 177 (75.32)   | 0.23    |
| Parity, n (%)                                  |               |               |               | 0.05    |               |               |               | 1.00    |
| ≤ 1                                            | 182 (77.78)   | 162 (69.23)   | 161 (68.51)   |         | 168 (71.79)   | 168 (71.79)   | 169 (71.91)   |         |
| ≥ 2                                            | 52 (22.22)    | 72 (30.77)    | 74 (31.49)    |         | 66 (28.21)    | 66 (28.21)    | 66 (28.09)    |         |
| Educational level, n (%)                       |               |               |               | 0.13    |               |               |               | 0.37    |
| Junior secondary or below                      | 113 (48.29)   | 126 (53.85)   | 136 (57.87)   |         | 114 (48.72)   | 127 (54.27)   | 134 (57.02)   |         |
| Senior high school/technical secondary school  | 61 (26.07)    | 47 (20.09)    | 39 (16.60)    |         | 52 (22.22)    | 52 (22.22)    | 43 (18.30)    |         |
| Junior college/university or above             | 60 (25.64)    | 61 (26.07)    | 60 (25.53)    |         | 68 (29.06)    | 55 (23.50)    | 58 (24.68)    |         |
| Income per month (Yuan), n (%)                 |               |               |               | 0.35    |               |               |               | 0.54    |
| < 5000                                         | 136 (58.12)   | 149 (63.68)   | 136 (57.87)   |         | 142 (60.68)   | 137 (58.55)   | 142 (60.43)   |         |
| 5000 to <10000                                 | 73 (31.20)    | 55 (23.50)    | 66 (28.09)    |         | 59 (25.22)    | 65 (27.78)    | 70 (29.79)    |         |
| ≥ 10000                                        | 25 (10.68)    | 30 (12.82)    | 33 (14.04)    |         | 33 (14.10)    | 32 (13.67)    | 23 (9.78)     |         |
| Histological type, n (%)                       |               |               |               | 0.08    |               |               |               | 0.40    |
| Serous                                         | 156 (66.67)   | 172 (73.50)   | 151 (64.26)   |         | 155 (66.24)   | 156 (66.67)   | 168 (71.49)   |         |
| Non-serous                                     | 78 (33.33)    | 62 (26.50)    | 84 (35.74)    |         | 79 (33.76)    | 78 (33.33)    | 67 (28.51)    |         |
| Histopathologic grade, n (%)                   |               |               |               | 0.41    |               |               |               | 0.77    |
| Well differentiated                            | 18 (7.69)     | 18 (7.69)     | 20 (8.51)     |         | 17 (7.26)     | 17 (7.26)     | 22 (9.36)     |         |
| Moderately differentiated                      | 18 (7.69)     | 10 (4.27)     | 20 (8.51)     |         | 15 (6.41)     | 19 (8.12)     | 14 (5.96)     |         |
| Poorly differentiated                          | 198 (84.62)   | 206 (88.03)   | 195 (82.98)   |         | 202 (86.32)   | 198 (84.62)   | 199 (84.68)   |         |

|                                        |                     |                     |                     |        |                     |                     |                     |        |
|----------------------------------------|---------------------|---------------------|---------------------|--------|---------------------|---------------------|---------------------|--------|
| FIGO stage, n (%)                      |                     |                     |                     | 0.45   |                     |                     |                     | 0.97   |
| I-II                                   | 118 (50.43)         | 106 (45.30)         | 118 (50.21)         |        | 112 (47.86)         | 116 (49.57)         | 114 (48.51)         |        |
| III-IV                                 | 107 (45.73)         | 123 (52.56)         | 108 (45.96)         |        | 115 (49.15)         | 111 (47.44)         | 112 (47.66)         |        |
| Mean (SD) total energy intake (kcal/d) | 1528.04<br>(564.25) | 1322.71<br>(516.17) | 1516.26<br>(554.38) | < 0.05 | 1491.95<br>(650.31) | 1353.62<br>(450.58) | 1521.41<br>(526.24) | < 0.05 |
| Mean (SD) protein intake (g/d)         | 54.27 (9.88)        | 58.67 (8.57)        | 62.40 (9.74)        | < 0.05 | 64.06 (12.16)       | 58.45 (6.31)        | 52.87 (6.98)        | < 0.05 |
| Mean (SD) fat intake (g/d)             | 33.48 (7.18)        | 35.30 (7.39)        | 36.33 (9.03)        | < 0.05 | 41.57 (8.27)        | 34.92 (4.00)        | 28.66 (4.89)        | < 0.05 |
| Mean (SD) Glycemic index               | 68.69 (4.80)        | 66.10 (4.74)        | 60.11 (5.66)        | < 0.05 | 61.09 (6.56)        | 66.36 (5.32)        | 67.41 (4.70)        | < 0.05 |
| Mean (SD) Glycemic load                | 153.68<br>(25.00)   | 148.59<br>(23.00)   | 135.30<br>(24.42)   | < 0.05 | 120.1 (18.50)       | 149.23 (12.11)      | 168.02<br>(16.63)   | < 0.05 |

MET, metabolic equivalents of task; SD, standard deviation.

\*Energy adjustment by residual method

**Supplementary Table 2.** Selected clinical characteristics and associations with overall survival among ovarian cancer patients (N=703)

| <b>Characteristic</b>        | <b>No. of deaths/total (%)</b> | <b>Adjusted HR * (95%CI)</b> |
|------------------------------|--------------------------------|------------------------------|
| <b>Age at diagnosis</b>      |                                |                              |
| ≤ 50                         | 45/258 (17.44)                 | 1.00 (ref)                   |
| > 50                         | 85/445 (19.10)                 | 1.24 (0.85-1.79)             |
| <b>Histological type</b>     |                                |                              |
| Serous                       | 92/479 (19.21)                 | 1.00 (ref)                   |
| Non-serous                   | 38/224 (16.96)                 | 1.71 (1.11-2.66)             |
| <b>Histopathologic grade</b> |                                |                              |
| Well differentiated          | 5/56 (8.93)                    | 1.00 (ref)                   |
| Moderately differentiated    | 7/48 (14.58)                   | 1.12 (0.35-3.57)             |
| Poorly differentiated        | 118/599 (19.70)                | 1.76 (0.70-4.43)             |
| <b>FIGO stage</b>            |                                |                              |
| I-II                         | 41/342 (11.99)                 | 1.00 (ref)                   |
| III-IV                       | 89/338 (26.33)                 | 2.54 (1.65-3.91)             |
| <b>Residual lesions</b>      |                                |                              |
| No                           | 82/553 (14.83)                 | 1.00 (ref)                   |
| <1 cm                        | 31/106 (29.25)                 | 1.73 (1.11-2.68)             |
| ≥1 cm                        | 17/44 (38.64)                  | 2.41 (1.39-4.16)             |
| <b>Comorbidities</b>         |                                |                              |
| No                           | 74/393 (18.83)                 | 1.00 (ref)                   |
| Yes                          | 56/310 (18.06)                 | 0.97 (0.68-1.38)             |

CI, confidence interval; HR, hazard ratio; Ref, reference.

\* Mutually adjusted for all other variables listed in the table.
